# Supplementary material
Source: PubMed Central journal article supplement (PMC7674252)
Supplement: NIHMS1639068-supplement-Appendix_1.pdf [file NIHMS1639068-supplement-Appendix_1.pdf]

## APPENDIX 1

Each of 3 self-report item has different response options, so we first transformed them linearly to a 0-100 scale. One summary self-report adherence was calculated by averaging the three 0-100 scales. See below.

### 1. Days taken:

- a. Transform raw data (days missed) to days taken, by subtracting days missed from 30.
- b. Transform days taken to 0-100 point scale by multiplying days taken by 3.33

### 2. Rating:

This item has six response options, as listed below. Transform rating to 0-100 point scale by assigning an appropriate point value to each response, as indicated below:

- Very Poor: 0 points
- Poor: 20 points
- Fair: 40 points
- Good: 60 points
- Very Good: 80 points
- Excellent: 100 points

### 3. Frequency:

This item also has six response options, as listed below. Transform frequency to 0-100 point scale by assigning an appropriate point value to each response, as indicated below:

- Never: 0 points
- Rarely: 20 points
- Sometimes: 40 points
- Usually: 60 points
- Almost always: 80 points
- Always: 100 points

### EXAMPLE:

- a. Days taken: Patient reports missing 6 days.  $30 - 6 = 24$  days taken.  $24 \times 3.33 = 79.92$  points.
- b. Rating: Patient reports a Fair job. Assign a point value of 40. Frequency: Patient reports Usually. Assign a point value of 60.
- c. Summary self-report adherence score:  $(79.92 + 40 + 60)/3 = 59.97$
